# Supplementary figures and images for: Preclinical proof of concept for VivoVec, a lentiviral-based platform for in vivo CAR T-cell engineering
Source: PubMed Central journal article supplement — J Immunother Cancer. 2023 Mar 14;11(3):e006292. doi: 10.1136/jitc-2022-006292 (PMC10016276; doi:10.1136/jitc-2022-006292), 2023-03-14

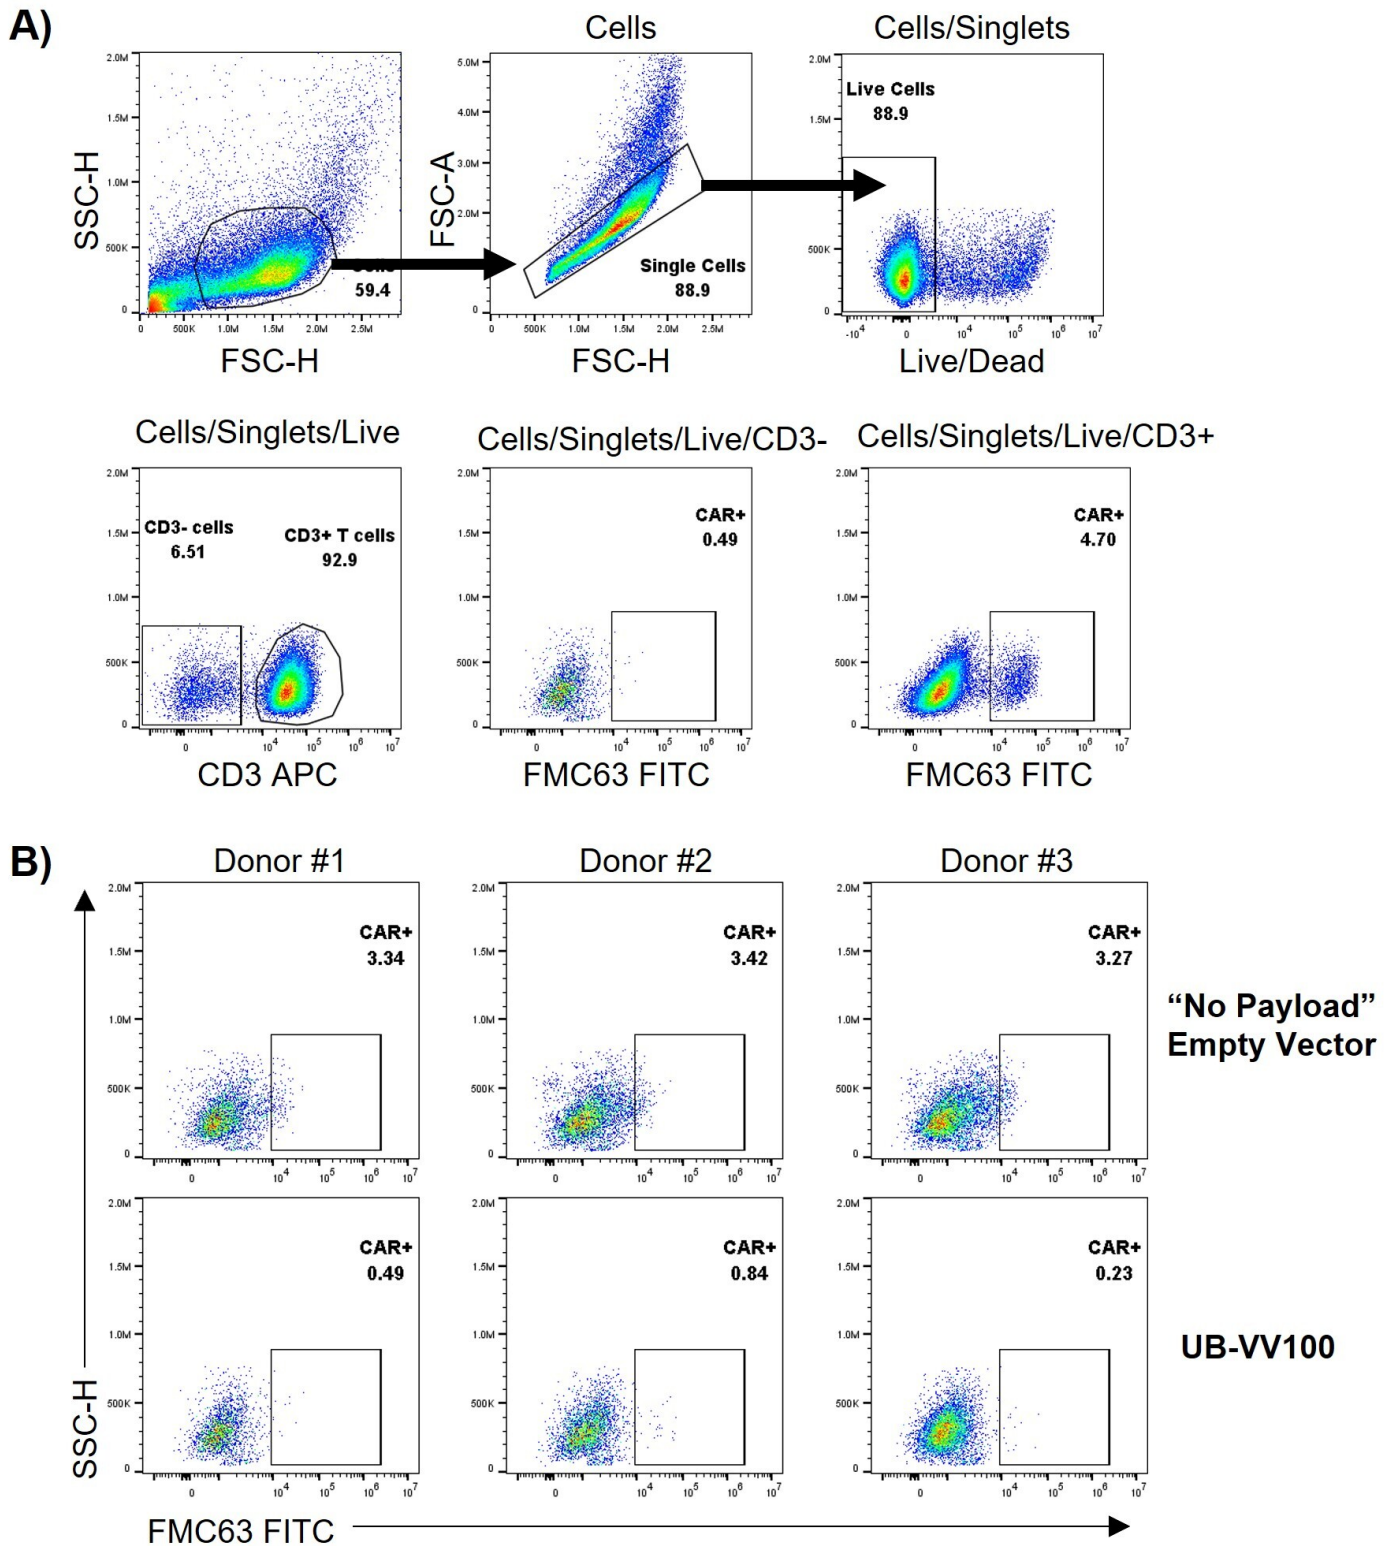

Supplement: jitc-2022-006292supp002.pdf [file jitc-2022-006292supp002.pdf]

A) Day 11 Vehicle

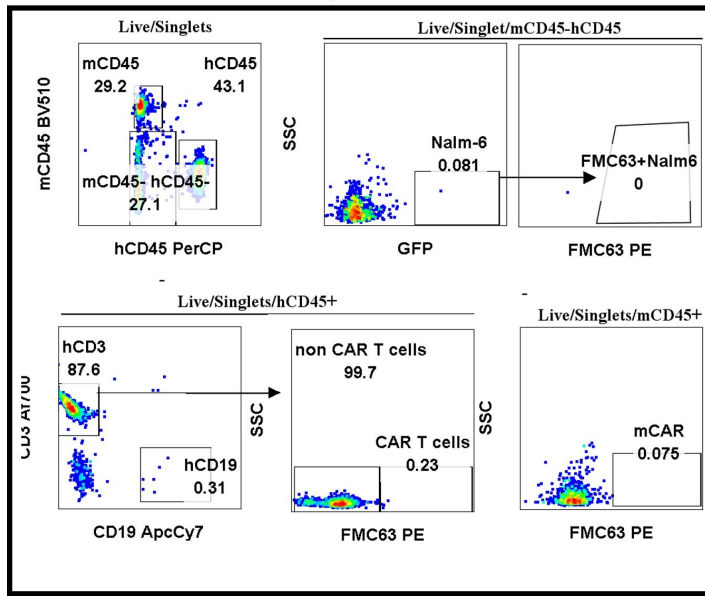

B) Day 11 270 E+06 TU UB-VV100

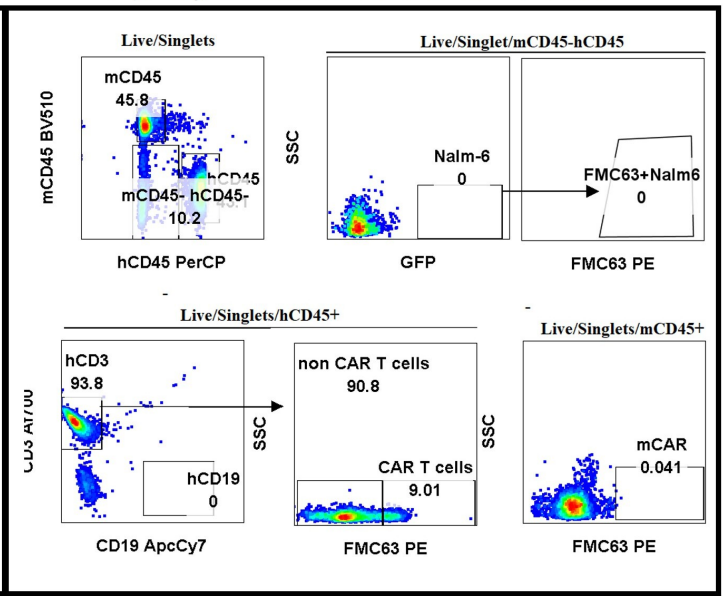

C) Day 32 Vehicle

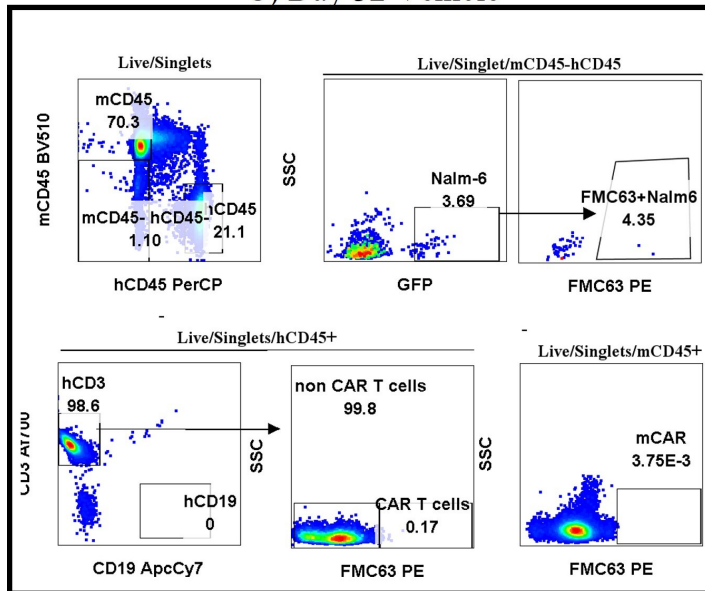

D) Day 32 270 E+06 TU UB-VV100

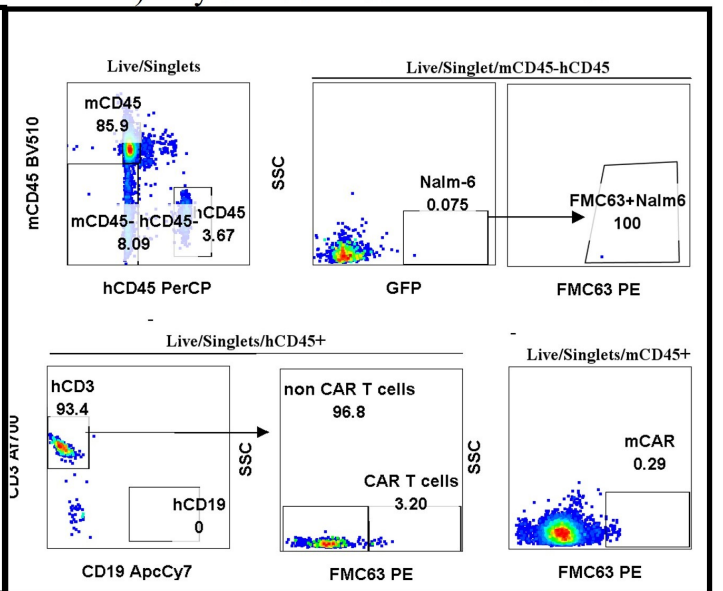

Supplement: jitc-2022-006292supp005.pdf [file jitc-2022-006292supp005.pdf]
