# Supplementary figures and images for: Preclinical proof of concept for VivoVec, a lentiviral-based platform for in vivo CAR T-cell engineering
Source: HighWire-hosted journal article supplement (doi:10.1136/jitc-2022-006292), 2023-03-01

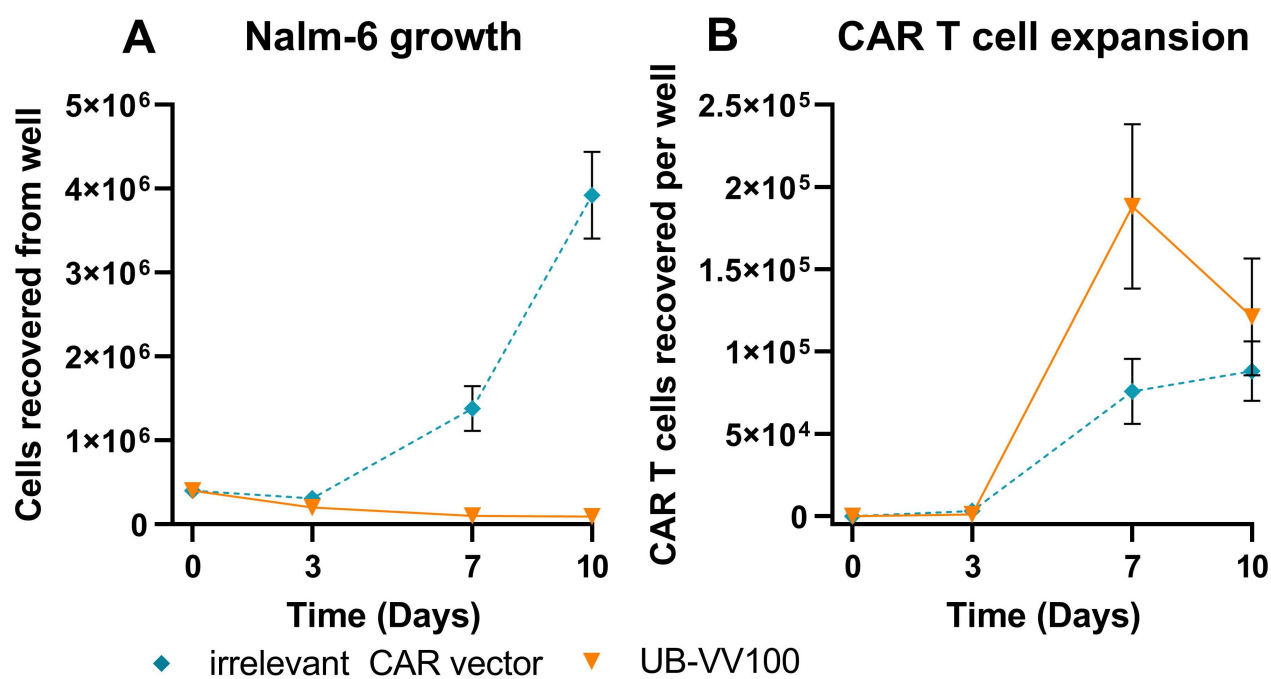

Supplement: jitc-2022-006292supp003_data_supplement.pdf [file jitc-2022-006292supp003_data_supplement.pdf]

## A) Survival in Raji tumor-bearing mice

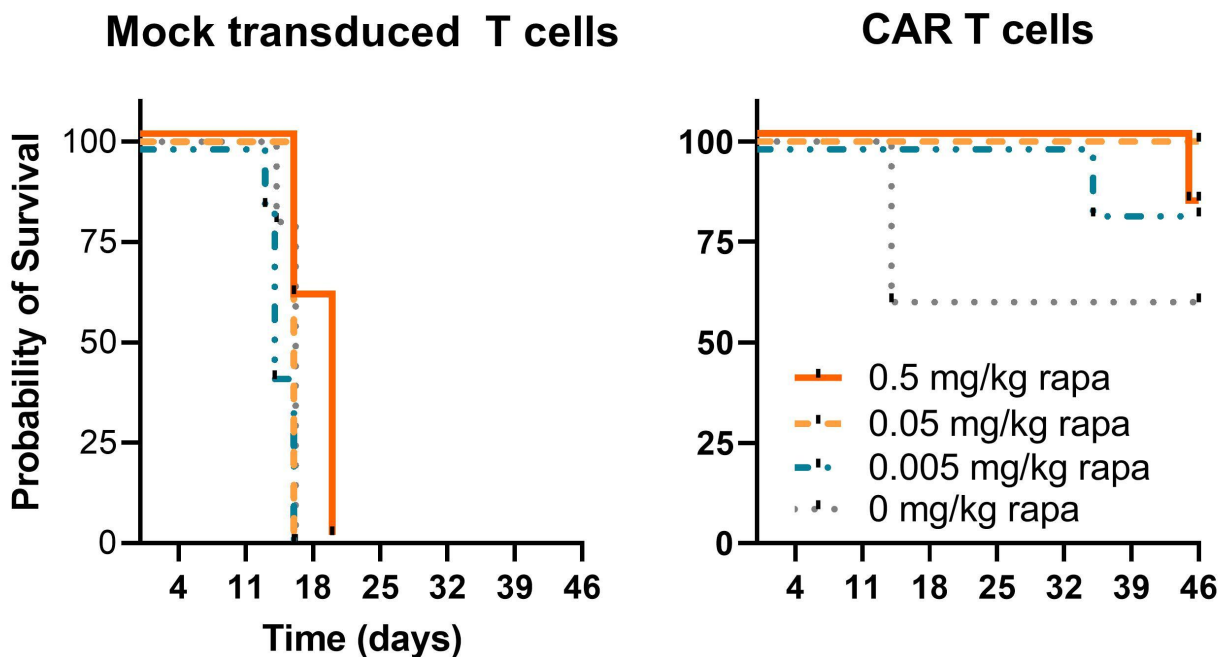

## B) CAR T cell enrichment and expansion in vivo

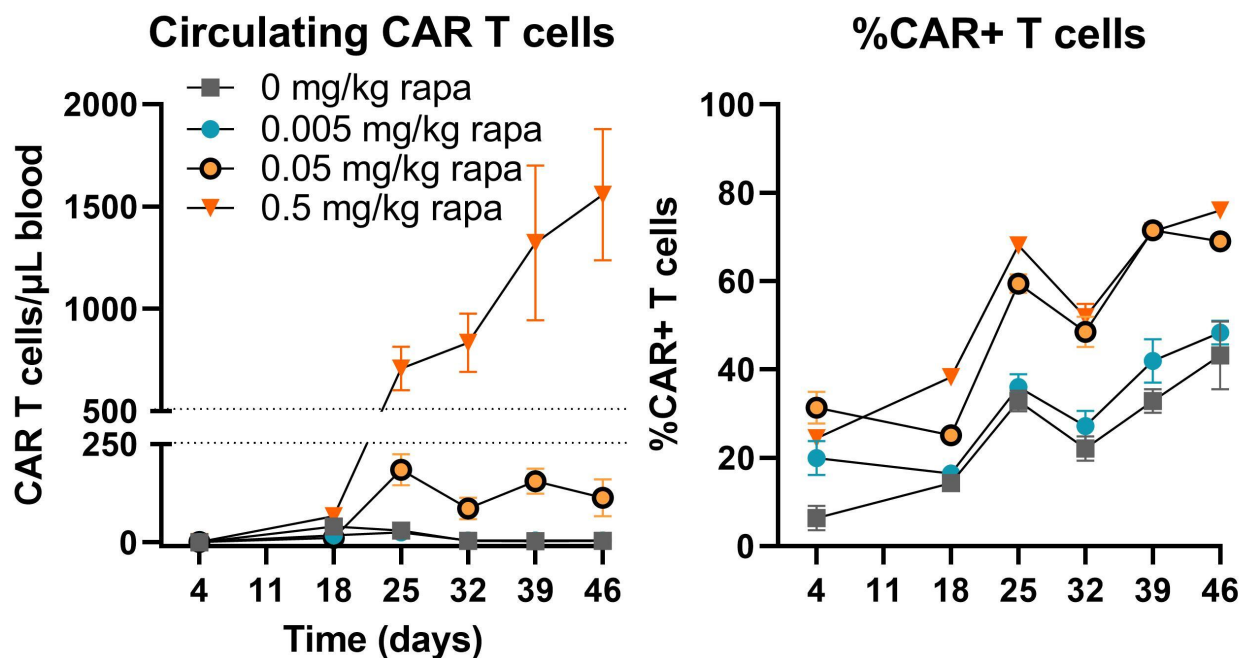

Supplement: jitc-2022-006292supp008_data_supplement.pdf [file jitc-2022-006292supp008_data_supplement.pdf]
